# Supplementary material for: A Screen for PKN3 Substrates Reveals an Activating Phosphorylation of ARHGAP18
Source: MDPI journal article supplement (doi:10.3390/ijms21207769), 2020-10-20
Supplement: s1 [file s1]

**Supplementary table 2.** The list of primers used in the study.

| Primer name              | Sequence                                   |
|--------------------------|--------------------------------------------|
| PKN3 T639G F             | TTTGTGGGTGAGTTTGTGCC                       |
| PKN3 T639G R             | GCAGGCATGGCTGGAGGT                         |
| ARHGAP18 N200 F          | TAGGATCCATGAGCTGGCTCTCCAGT                 |
| ARHGAP18 N200 R          | TAGAATTCTCATTTGTTTTCATTTGTTCT              |
| ARHGAP18 N50 R           | TAGAATTCTCAGCTTTCCTGGTTCATAGT              |
| ARHGAP18 Iso2 F          | ACAAGTCCGGACTCAGATCTATGAACCAGGAAAGCACCACCA |
| ARHGAP18 Iso2 R          | TGGTGGTGCTTTCCTGGTTCATAGATCTGAGTCCGGACTTGT |
| ARHGAP18 ΔN200 F         | ATCTATGAGCTGGTACCAAGGAAGAGA                |
| ARHGAP18 ΔN200 R         | TCTCTTCCTTGGTACCAGCTCATAGAT                |
| ARHGAP18 Δ201-323 F      | CAAATGAAAACAAAGTTCCATTGACAGC               |
| ARHGAP18 Δ201-323 R      | GCTGTCAATGGAACTTTGTTTTCATTTG               |
| ARHGAP18 ΔGAP F          | CTGGTCTTTTTTGCCCCAAGTTTATTGT               |
| ARHGAP18 ΔGAP R          | ACAATAAACTTGGGGCAAAAAAGACCAG               |
| ARHGAP18 ΔC525 F         | AACTTCTGTGGACATAGAAGTCGAGAATTC             |
| ARHGAP18 ΔC525 R         | GAATTCTCGAGTTCTATGTCCACAGAAGTT             |
| ARHGAP18 N200 Δ1-50 F    | CGGACTCAGATCCATGACCACCATCAAAGTTA           |
| ARHGAP18 N200 Δ1-50 R    | TAACTTTGATGGTGGTCATGGATCTGAGTCCG           |
| ARHGAP18 N200 Δ51-100 F  | TATGAACCAGGAAAGCGTCAAAGAGCCTGATG           |
| ARHGAP18 N200 Δ51-100 R  | CATCAGGCTCTTTGACGCTTTCCTGGTTCATA           |
| ARHGAP18 N200 Δ101-150 F | TCAAGAGGTGGTTGTTTCGAGTAGAGACGGTCT          |
| ARHGAP18 N200 Δ101-150 R | AGACCGTCTCTACTCGAACAACCACCTCTTGA           |
| ARHGAP18 N200 Δ151-200 F | AGCAGCAGTTCAGAAAGTGAGAATTCTGCAGTC          |
| ARHGAP18 N200 Δ151-200 R | GACTGCAGAATTCTCACTTCTGAACTGCTGCT           |
| ARHGAP18 N200 Δ1-12 F    | CGGACTCAGATCCATGACAGCCTACCACCCCA           |
| ARHGAP18 N200 Δ1-12 R    | TGGGGTGGTAGGCTGTCATGGATCTGAGTCCG           |
| ARHGAP18 N200 Δ13-25 F   | CCAGGGAGTGGTACTAAACAGCCATGCAAAG            |
| ARHGAP18 N200 Δ13-25 R   | CTTTCATGGCTGTTTAGTACCACTCCCTGG             |
| ARHGAP18 N200 Δ26-37 F   | GGACCAGACCGTCGGGAGTCGCAGATATGGCC           |
| ARHGAP18 N200 Δ26-37 R   | GGCCATATCTGCGACTCCCGACGGTCTGGTCC           |
| ARHGAP18 N200 Δ38-50 F   | GGAGGAAGCCACGTCGACCACCATCAAAGTTA           |
| ARHGAP18 N200 Δ38-50 R   | TAACTTTGATGGTGGTCGACGTGGCTTCCTCC           |

**Supplementary table 3.** The sequence of synthesized ARHGAP18. Silent mutations were introduced in the design of ARHGAP18 cDNA in order to disrupt *XhoI*, *SacI*, *BamHI* and *NcoI* restriction sites.

| ARHGAP18                                                                                                                                                                                                                                                                                                                                                                                                                                                                                                                                                                                                                                                                                                                                                                                                                                                                                                                                                                                                                                                                                                                                                                                                                                                                                                                                                                                                                                                                                                                                                                                                                                                                                                                                                                                                                                                                                                                                                                                                                                                                                                                                                                                                                |
|-------------------------------------------------------------------------------------------------------------------------------------------------------------------------------------------------------------------------------------------------------------------------------------------------------------------------------------------------------------------------------------------------------------------------------------------------------------------------------------------------------------------------------------------------------------------------------------------------------------------------------------------------------------------------------------------------------------------------------------------------------------------------------------------------------------------------------------------------------------------------------------------------------------------------------------------------------------------------------------------------------------------------------------------------------------------------------------------------------------------------------------------------------------------------------------------------------------------------------------------------------------------------------------------------------------------------------------------------------------------------------------------------------------------------------------------------------------------------------------------------------------------------------------------------------------------------------------------------------------------------------------------------------------------------------------------------------------------------------------------------------------------------------------------------------------------------------------------------------------------------------------------------------------------------------------------------------------------------------------------------------------------------------------------------------------------------------------------------------------------------------------------------------------------------------------------------------------------------|
| TACAGATCTATGAGCTGGCTCTCCAGTTCCCAGGGAGTGGTACTAACAGCCTACCACCCCAGCGGCAAGGACC<br>AGACCGTCGGGAACAGCCATGCAAAGGCAGGGGAGGAAGCCACGTCGAGTCGCAGATATGGCCAGTACACTAT<br>GAACCAGGAAAGCACCACCATCAAAGTTATGGAGAAGCCTCCATTTGATCGATCAATTTCCCAGGATTCTTTG<br>GATGAACTATCTATGGAAGACTATTGGATAGAACTAGAAAACATCAAGAAATCTAGTGAAAACAGCCAAGAAG<br>ATCAAGAGGTGGTTGTTGTCAAAGAGCCTGATGAGGGAGAATTGGAAGAAGAGTGGCTTAAAGAGGCCGGTTT<br>ATCCAATCTCTTCGGAGAGTCTGCTGGAGATCCACAGGAAAGCATTGTGTTTTTATCAACATTGACGCGGACC<br>CAGGCAGCAGCAGTTCAGAAGCGAGTAGAGACGGTCTCCCAGACCTTGAGGAAAAAAAAACAAACAGTACCAGA<br>TTCCTGACGTCAGAGACATATTTGCTCAACAGAGAGAATCAAAAGAAACAGCTCCAGGTGGCACTGAATCGCA<br>GTCACTTAGAACAAATGAAAACAAATACCAAGGAAGAGATGACGAGGCATCTAACCTTGTTGGTGAAGAGAAG<br>CTGATCCACCTGAGGAGACGCCTGCCCCTGAAACAGACATCAACCTGGAGGTATCATTTGCCGAGCAAGCAC<br>TCAATCAGAAAGAGAGTTCCAAGGAGAAAATCCAGAAGAGCAAAGGCGATGATGCCACATTACCTAGTTTCAG<br>ATTGCCAAAAGACAAAACGGGTACCACAAGGATTGGTGACCTCGCACCCCAGGACATGAAGAAAGTTTGCCAT<br>TTAGCCCTAATTGAGCTGACTGCCCTCTATGATGTATTGGGTATTGAGCTGAAACAACAAAAAGCTGTGAAAA<br>TCAAAACAAAAGATTCTGGTCTTTTTTTCGCTTCCATTGACAGCGCTATTAGAACAAGATCAGAGGAAAGTACC<br>AGGAATGCGAATACCCTTGATCTTTCAAAAACCTGATTTCTCGAATTGAAGAGAGAGGTTTGAAAACAGAAGGC<br>CTCTTACGAATCCCTGGAGCTGCCATTAGAATCAAGAATCTTTGCCAAGAAGCTAGAAGCAAAGTTTTATGAAG<br>GGACTTTTAATTGGGAAAGTGTCAAACAGCATGATGCCGCCAGCCTGCTGAAGCTCTTCATTTCGGGAGTTGCC<br>CCAGCCACTGCTCAGTGTGGAGTATCTCAAAGCCTTTTCAGGCTGTCCAGAATCTTCCAACCAAGAAGCAGCAA<br>CTACAGGCTTTGAACCTTCTTGTCATCCTCCTACCTGATGCAAACAGGGACACACTGAAGGCCCTTCTTGAAT<br>TTCTCCAAAGAGTAATAGATAATAAAGAAAAAAATAAAATGACAGTCATGAATGTAGCAATGGTCATGGCCCC<br>GAATCTCTTTATGTGTCATGCATTGGGATTGAAGTCCAGTGAACAGCGAGAATTTGTAATGGCAGCTGGGACA<br>GCAAATACCATGCACTTATTGATTAAGTACCAAAAACCTTCTGTGGACAATTCCCAAGTTTATTGTAAACCAAG<br>TGAGGAAGCAAAACACGGAAAATCATAAAAAGGATAAAAAGAGCCATGAAGAAATTGCTGAAGAAAATGGCTTA<br>TGACCGAGAAAAATATGAAAAGCAAGATAAGAGTACAAATGATGCTGACGTTTCCTCAGGGAGTGATTTCGAGTG<br>CAAGCTCCCCATCTTTCGAAAGTTTCAATGGCAATACAGCTAACTGAAGAACTAAAAGCCAGTGATGTACTTG<br>CCAGGTTTCTCAGCCAAGAAAGTGGGGTTGCCCAGACTCTCAAGAAAGGAGAAGTTTTTTTTGTATGAAATTGG<br>AGGAAATATTGGGGAACGCTGCCTTGATGATGACACTTACATGAAGGATTTATATCAGCTTAACCCAAATGCT<br>GAGTGGGTTATAAAGTCAAAGCCATTGTAGAACTCGAGAATTCTGA |
